# Supplementary figures and images for: Contribution of Live Video to Physicians’ Remote Assessment of Suspected COVID-19 Patients in an Emergency Medical Communication Centre: A Retrospective Study and Web-Based Survey
Source: MDPI journal article supplement (doi:10.3390/ijerph20043307), 2023-02-14

**Figure S1:** Monthly flow of remote assessments performed by physicians.

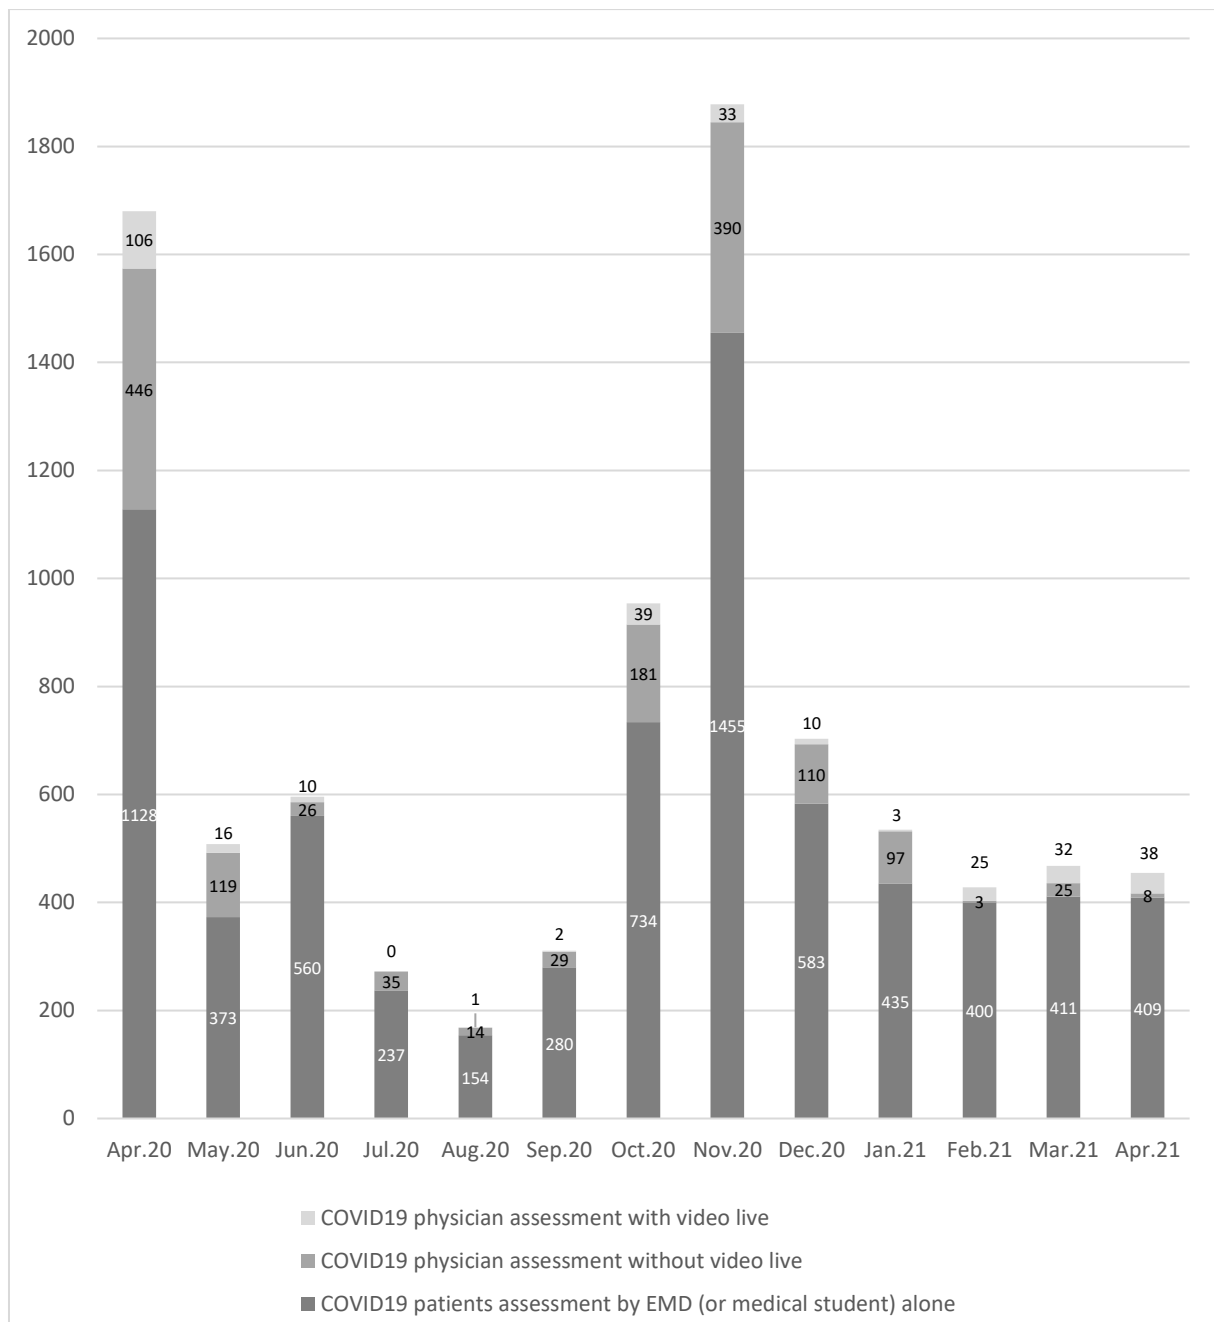

Supplement: s1 [file s1]
